# Supplementary material for: Direct synthesis of pure single-crystalline Magnéli phase Ti8O15 nanowires as conductive carbon-free materials for electrocatalysis
Source: Royal Society of Chemistry journal article supplement (doi:10.1039/c4nr05806b), 2015-01-01
Supplement: c4nr05806b1.pdf [file c4nr05806b1.pdf]

## Supplementary Information

### **Direct Synthesis of Pure Single-Crystalline Magnéli Phase Ti<sub>8</sub>O<sub>15</sub> Nanowires as Conductive Carbon-Free Material for Electrocatalysis**

Chunyong He,<sup>1†</sup> Shiyong Chang,<sup>1,2†</sup> Xiangdong Huang,<sup>2,\*</sup> Qingquan Wang,<sup>2</sup> Ao Mei<sup>2</sup>  
and Pei Kang Shen<sup>1,\*</sup>

<sup>1</sup> *State Key Laboratory of Optoelectronic Materials and Technologies, School of Physics and Engineering, Sun Yat-sen University, Guangzhou, 510275, PR China.*

<sup>2</sup> *Automotive Engineering Institute, Guangzhou Automobile Group Co., Ltd, Guangzhou, 510640, PR China.*

<sup>†</sup>These authors contributed equally to this work.

\* e-mail: [stsspk@mail.sysu.edu.cn](mailto:stsspk@mail.sysu.edu.cn); [huangxd@gaei.cn](mailto:huangxd@gaei.cn).

## Schematic diagram of apparatus

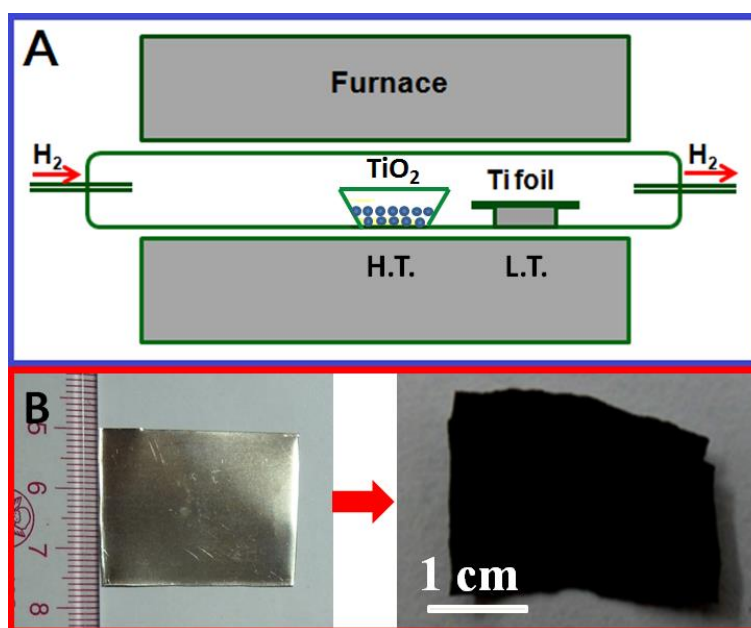

**Figure S1** (A) Schematic diagram of the experimental apparatus for growth of  $\text{Ti}_8\text{O}_{15}$  NWs, the temperature decreases gradually from centre to the right, giving two temperature regions: high (H.T.) and low temperature (L.T.), (B) Digital pictures of Ti substrate before and after experiment.

Since no catalyst was used in the process of the growth of the  $\text{Ti}_8\text{O}_{15}$  NWs, suggesting that the growth mechanism of the  $\text{KTi}_8\text{O}_{16}$  NWs may not be dominated by the vapor-liquid-solid (VLS) mechanism, which is frequently employed to explain the growth of nanowires and nanoarchitectures.<sup>S1,S2</sup> Instead, we propose a possible growth mechanism for the formation of the  $\text{KTi}_8\text{O}_{16}$  NWs based on the modified vapor-solid (VS) mechanism.<sup>S3,S4</sup> A two-step path reaction process was proposed in our synthesis process of  $\text{KTi}_8\text{O}_{16}$  NWs, showing as follows:

(a) The  $\text{TiO}_2$  powders in the quartz boat at the center of the tube (the high temperature

region, H.T.) were reduced to form  $H_2O(g)$ :

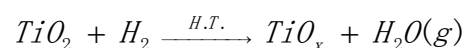

(b) The  $H_2O(g)$  reacted with the Ti on the Ti substrate (the low temperature region, L.T.) to form oxygen-deficient tetragonal phase of  $KTi_8O_{16}$  NWs in  $H_2$  atmosphere.

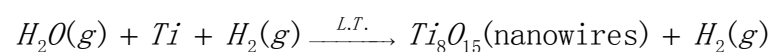

## Additional experimental data

### Calculation Details

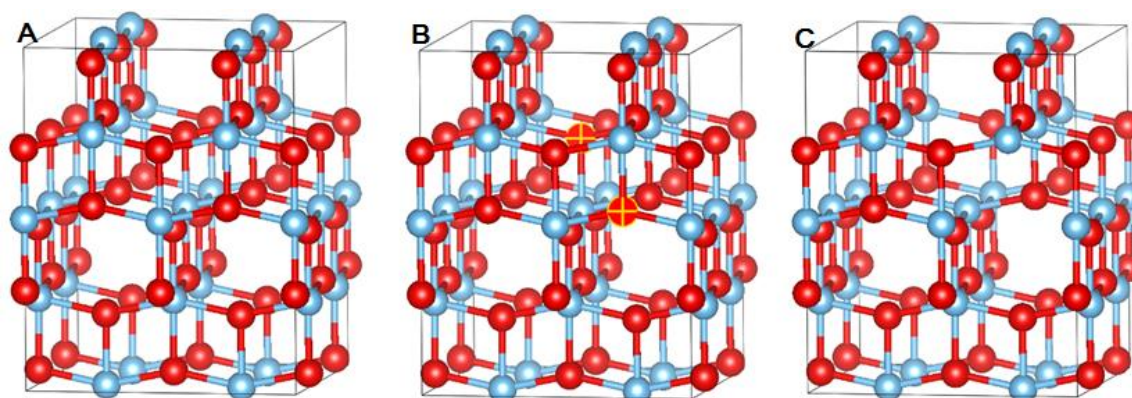

**Figure S2** Supercell models of (A) anatase  $TiO_2$ , (B) the site of oxygen vacancy, (C) Magneli phase  $Ti_8O_{15}$ .

Anatase  $TiO_2$  has a tetragonal structure with lattice parameters  $a = b = 3.776 \text{ \AA}$ ,  $c = 9.486 \text{ \AA}$ . To calculate anatase  $TiO_2$ , a  $2 \times 2 \times 1$  supercell was constructed with 16 Ti and 32 O atoms, as shown in Figure 1(A). The calculate model of  $Ti_8O_{15}$  was constructed from removed two O atoms from anatase  $TiO_2$  supercell and optimized the atomic structure, as shown in Figures 1(B)–1(C).

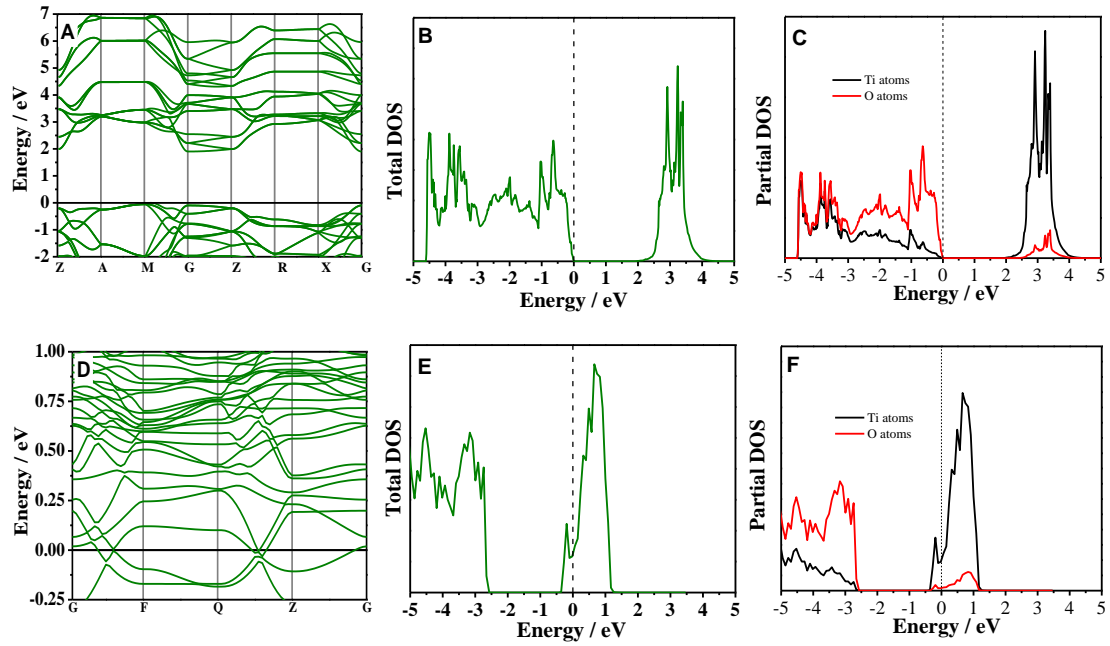

**Figure S3** Energy-band diagram, total density of states and partial density of states of anatase TiO<sub>2</sub>(A,B,C) and Magneli phase Ti<sub>8</sub>O<sub>15</sub>(D,E,F).

First-principles calculations were performed using the CASTEP module in Materials Studio 5.0 developed by Accelrys Software Inc. Electron-ion interactions were modeled using ultrasoft pseudopotentials in the Vanderbilt form. The states Ti:  $3s^2 3p^6 3d^2 4s^2$  and O:  $2s^2 2p^4$  were treated as valence states. The wave functions of the valence electrons were expanded through a plane wave basis-set and the cut off energy was selected as 500 eV. The Monkhorst-Pack scheme Kpoints grid sampling was set at  $7 \times 7 \times 7$  in the supercells. The convergence threshold for self-consistent iterations was set at  $5 \times 10^{-7}$  eV. The lattice parameters and atomic positions for each supercell system were first optimized using the generalized gradient approximation (GGA) together with the method. The optimization parameters were set as follows: energy change =  $5 \times 10^{-6}$  eV/atom, maximum force =  $0.01$  eV/Å, maximum stress =  $0.02$  GPa, and maximum displacement tolerance =  $0.005$  Å.

The electronic structure of magneli phase titanium suboxide  $\text{Ti}_8\text{O}_{15}$  are studied by using the plane-wave ultrasoft pseudopotential method based on the density functional theory. The band structure reveals that the energy band gap of  $\text{Ti}_8\text{O}_{15}$  is reduced a lot compared with that of anatase  $\text{TiO}_2$ , which is due to the fact that  $\text{O}2\text{p}$ ,  $\text{Ti}3\text{p}$  and  $\text{Ti}3\text{d}$  of  $\text{Ti}_8\text{O}_{15}$  shift toward the left compared with those of  $\text{TiO}_2$ , and a new electron energy level formed by the redundant electrons of  $\text{Ti}3\text{d}$  and  $\text{Ti}3\text{p}$  of  $\text{Ti}_8\text{O}_{15}$  due to the lack of oxygen atom in lattice. The results from density of states (DOS) analysis show that electron distribution near the Fermi level of  $\text{Ti}_8\text{O}_{15}$  is different from that of anatase  $\text{TiO}_2$ , contribution of  $\text{O}2\text{p}$  to Fermi level decrease and that of  $\text{Ti}3\text{d}$  increase, compared with anatase  $\text{TiO}_2$  which only has high electrical conductivity, because its narrow forbidden band width results in the Transitions of Electron from the valence band to the conduction band energy required to reduce.

### **Conductivity Measurements**

To measure the conductivity under conditions of low energy and bias voltages, a voltage ramp of 0–0.05 V was applied across split electrodes in steps of 0.025 V for two-probe measurements using a source meter (Keithley 2400). For each measurement, after allowing the exponential decay of the transient ionic current, the steady-state electronic current for each voltage was measured every second over a minimum period of 100 s using a Labview data acquisition program (National Instruments). The time-averaged current for each applied voltage was calculated to create the current–voltage (I–V) characteristics. For the two-probe measurement, the

linearity of the I–V characteristics was maintained by applying an appropriate low voltage/current. The dissipative power was kept under  $1 \times 10^{-6}$  W to eliminate self-heating effects.

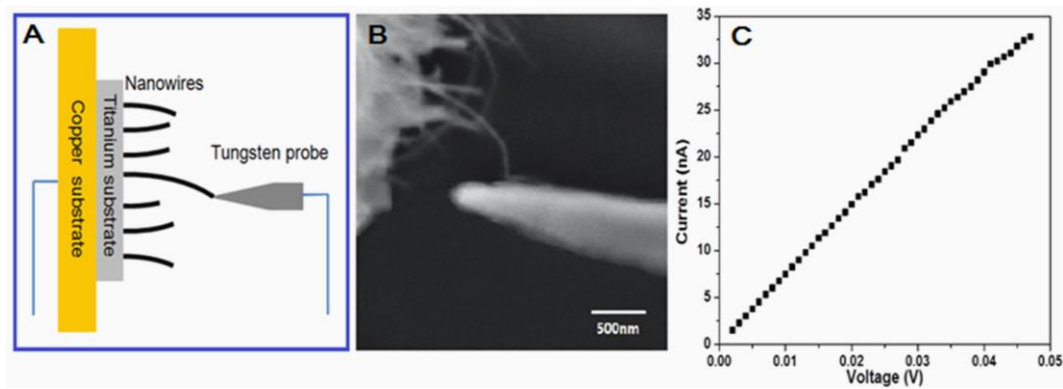

**Figure S4.** (A) Schematic diagram of the conductivity measuring experiment, (B) SEM image of  $\text{Ti}_8\text{O}_{15}$  nanowire electrode, (C) I–V characteristics of a single  $\text{Ti}_8\text{O}_{15}$  nanowire at room temperature.

### Microscopic morphological characteristics

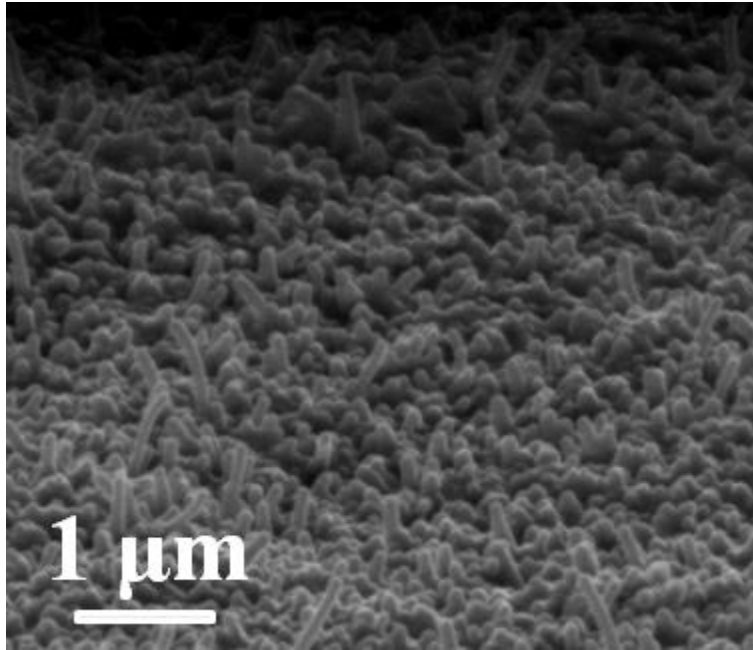

**Figure S5.** SEM image of club-shaped  $\text{Ti}_8\text{O}_{15}$  nanoparticles, which were formed in the initial stage of the growth of  $\text{Ti}_8\text{O}_{15}$  NWs.

## Electrochemical performance

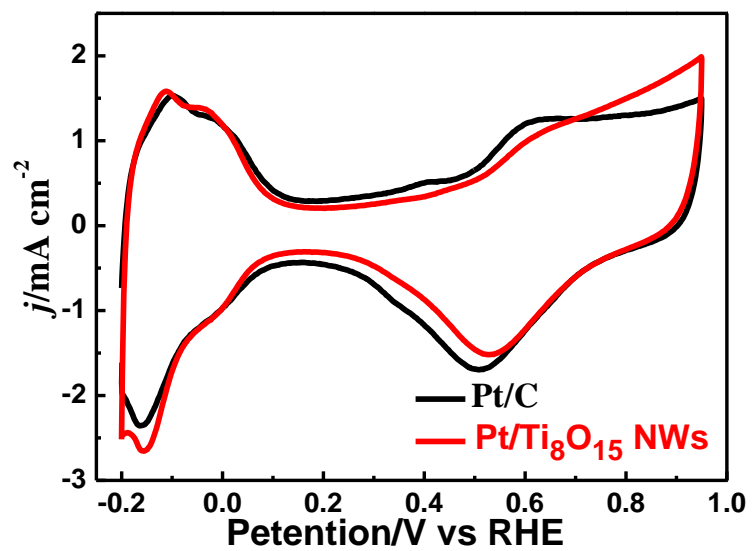

**Figure S6.** Cyclic voltammograms of Pt/C and Pt/Ti<sub>8</sub>O<sub>15</sub> NWs in 0.5 mol L<sup>-1</sup> H<sub>2</sub>SO<sub>4</sub> with the scan rate of 20 mV s<sup>-1</sup> at 30 °C

## Microscopic morphological characteristics

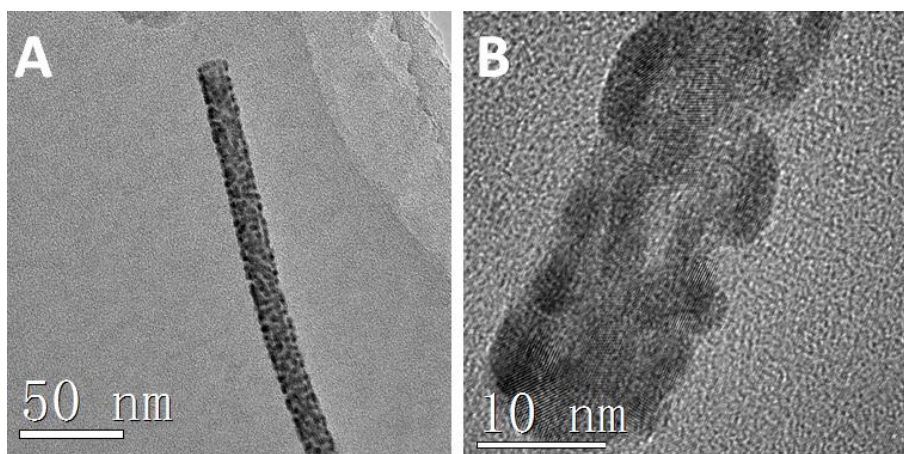

**Figure S6.** (A,B) TEM images of Pt/Ti<sub>8</sub>O<sub>15</sub> NWs after 6,000 cycles.



## References

- S1 Y. Hao, G. Meng, Z. L. Wang, C. Ye, L. Zhang, *Nano Lett.* 2006, **6**, 1650-1655.
- S2 X. Duan, C. M. Lieber, *Adv. Mater.* 2000, **12**, 298-302.
- S3 J. Zhou, N. S. Xu, S. Z. Deng, J. Chen, J. C. She, Z. L. Wang, *Adv. Mater.* 2003, **15**, 1835-1840.
- S4 Z. W. Pan, Z. R. Dai, Z. L. Wang, *Science* 2001, **291**, 1947-1949.
